# Supplementary material for: Computational Evaluation of the Strict Master and Random Template Models of Endogenous Retrovirus Evolution
Source: PubMed Central journal article supplement (PMC5029938; doi:10.1371/journal.pone.0162454), 2016-09-20

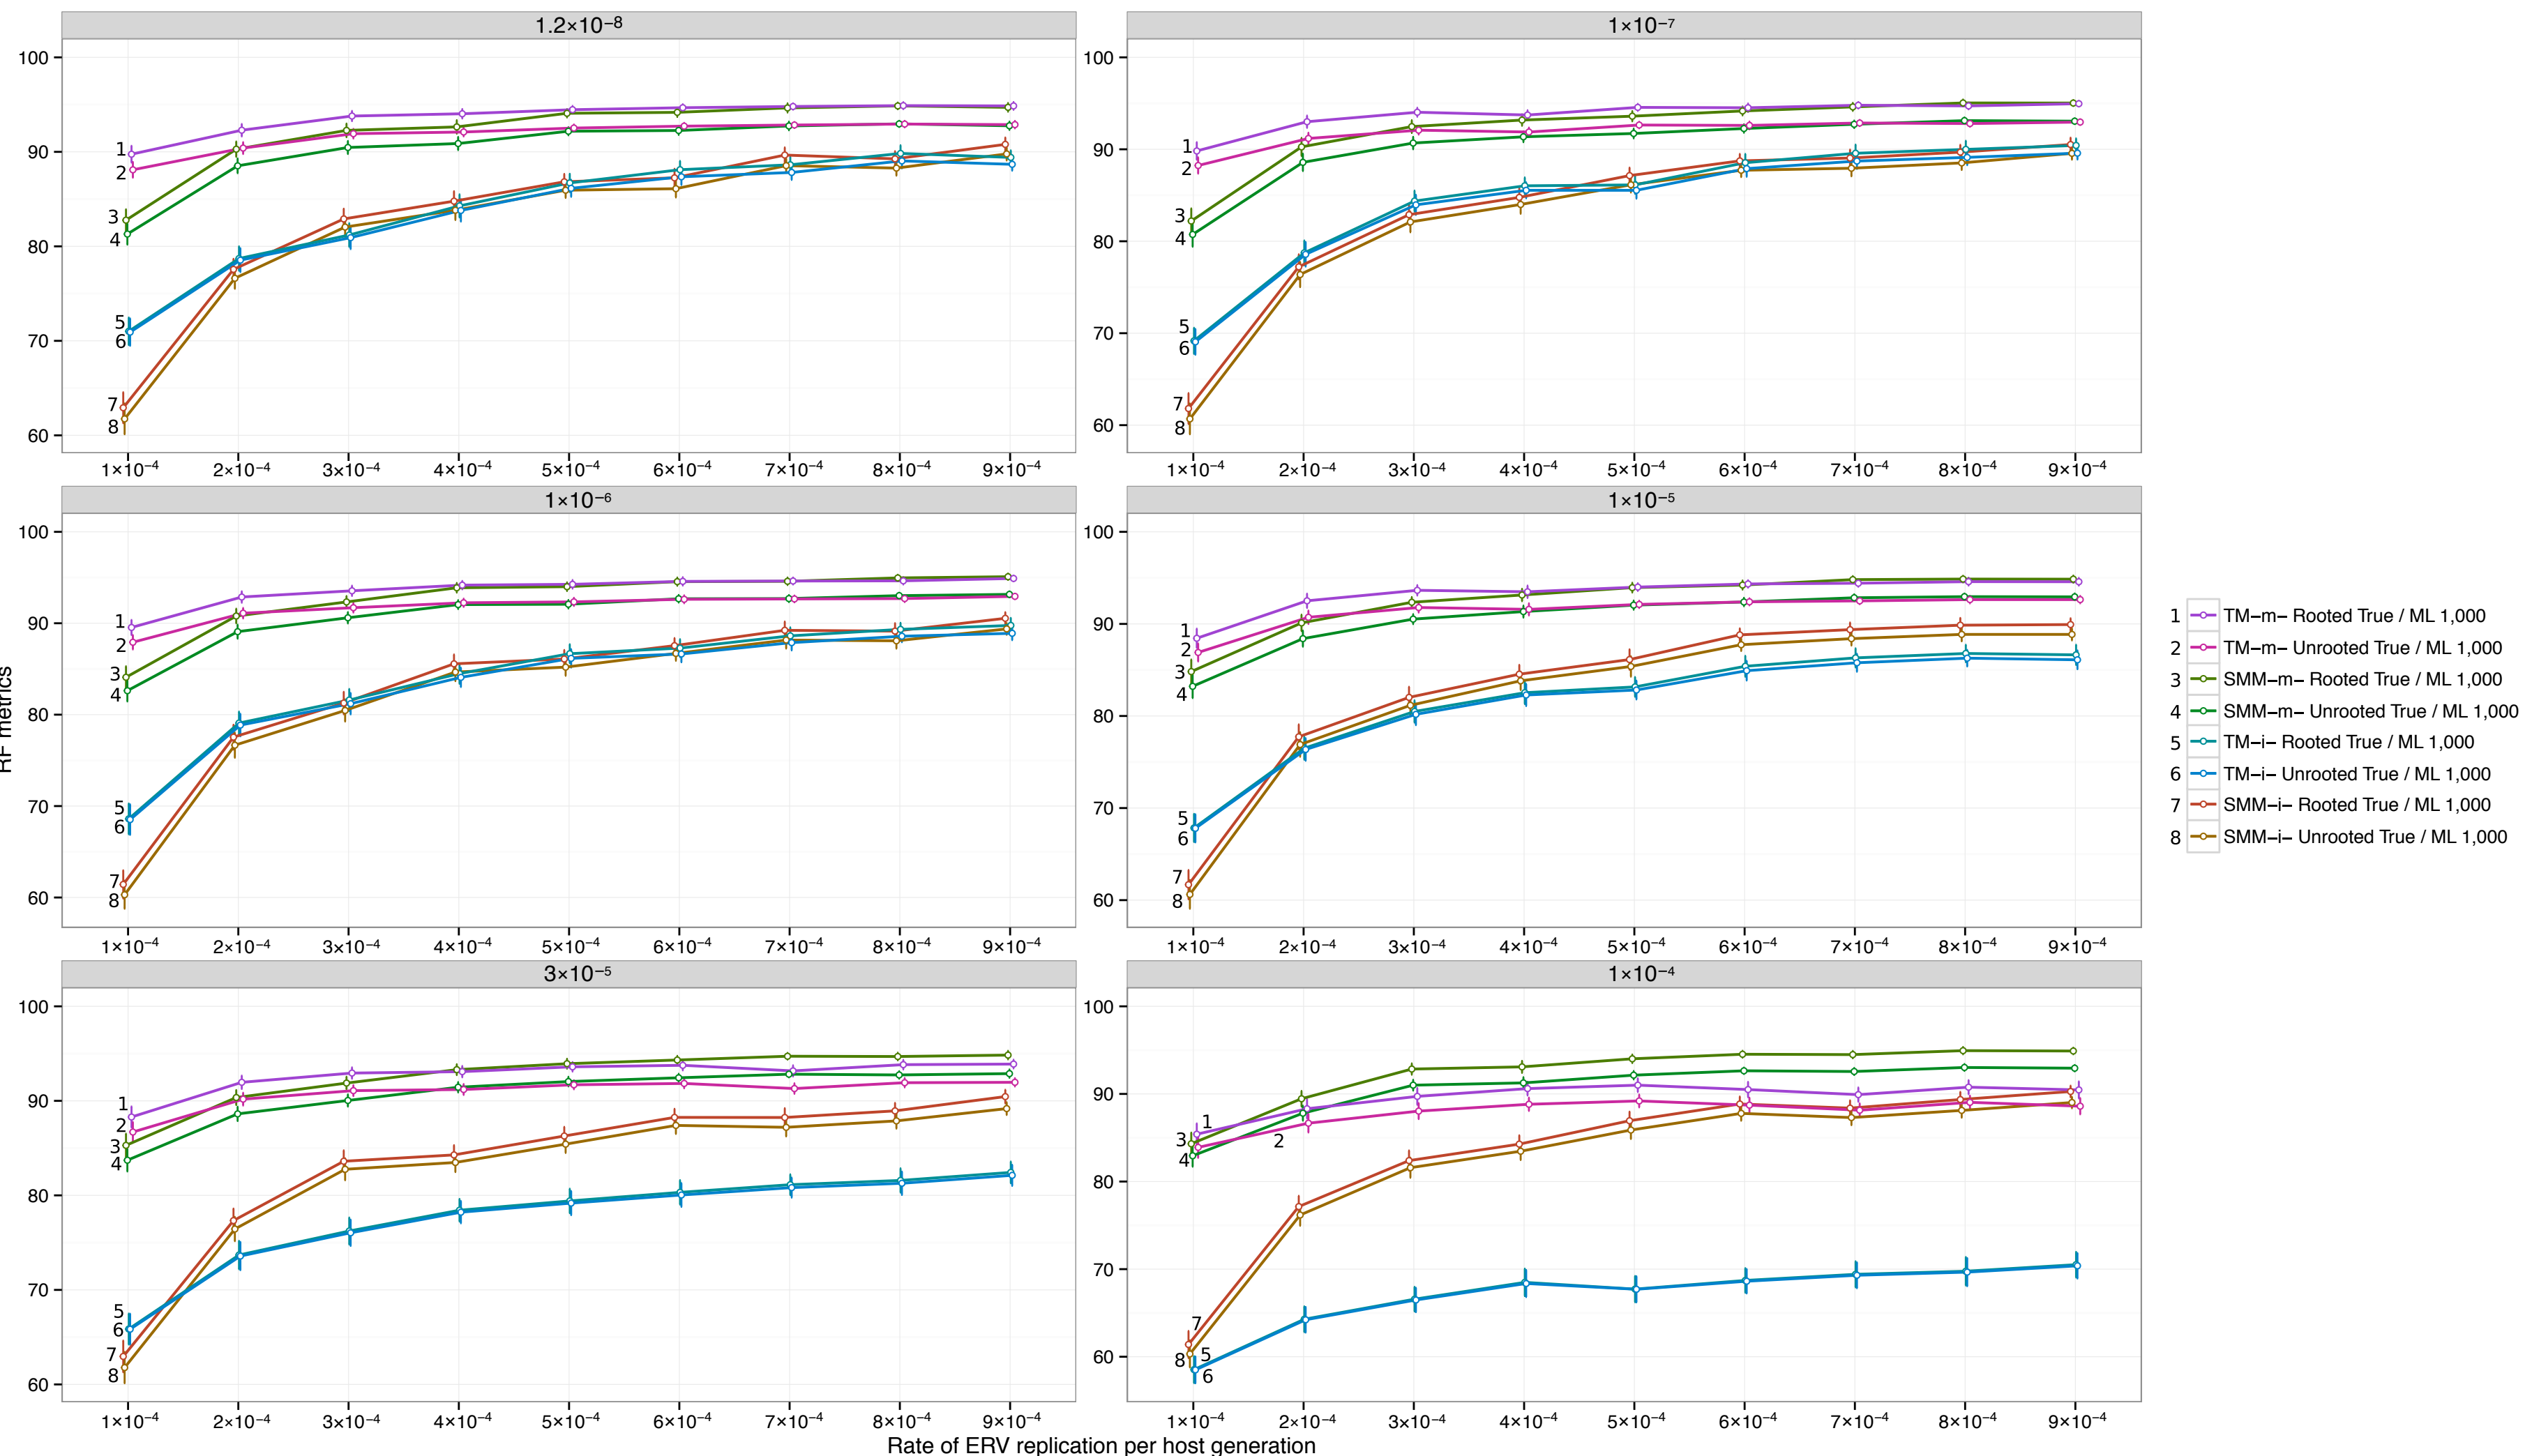

Supplement: pone.0162454.s001.pdf [file pone.0162454.s001.pdf]
