# Supplementary material for: Computational Evaluation of the Strict Master and Random Template Models of Endogenous Retrovirus Evolution
Source: PubMed Central journal article supplement (PMC5029938; doi:10.1371/journal.pone.0162454), 2016-09-20
Supplement: pone.0162454.s002.pdf [file pone.0162454.s002.pdf]

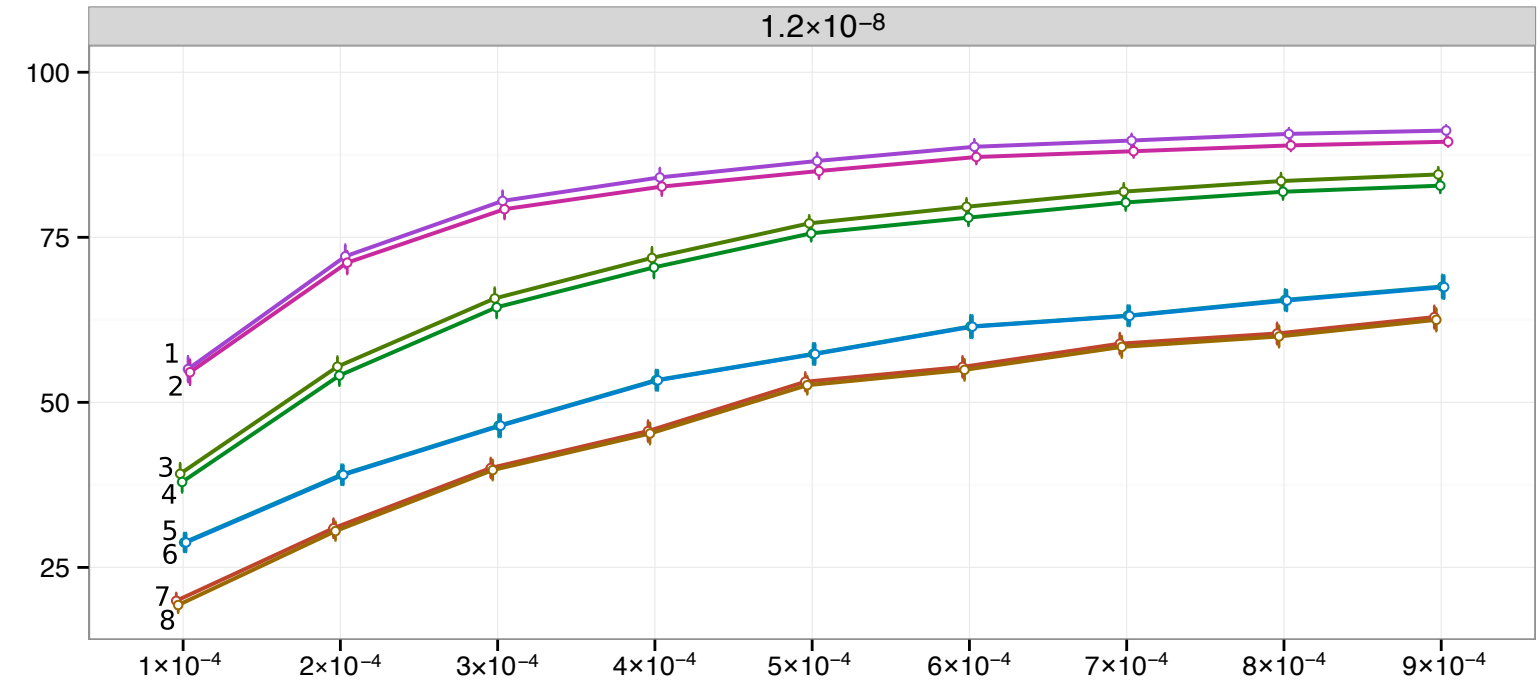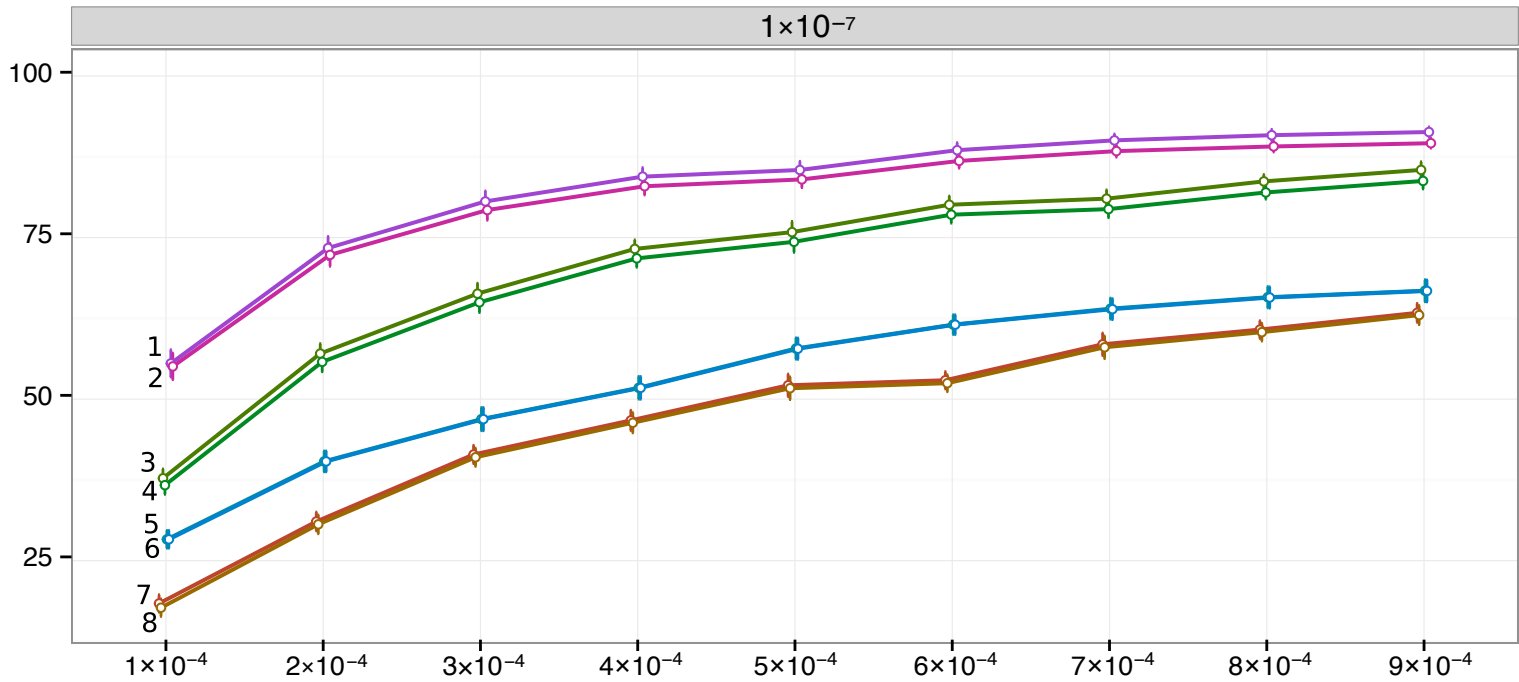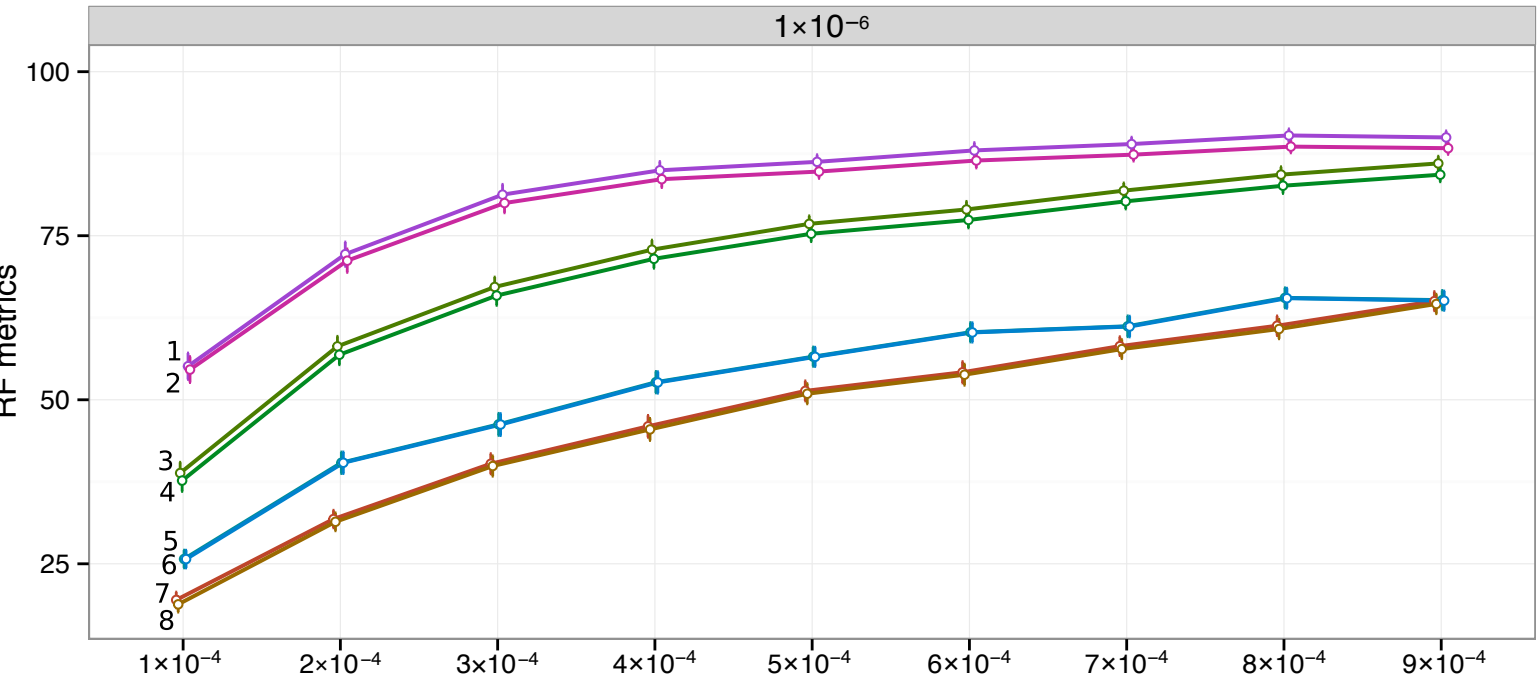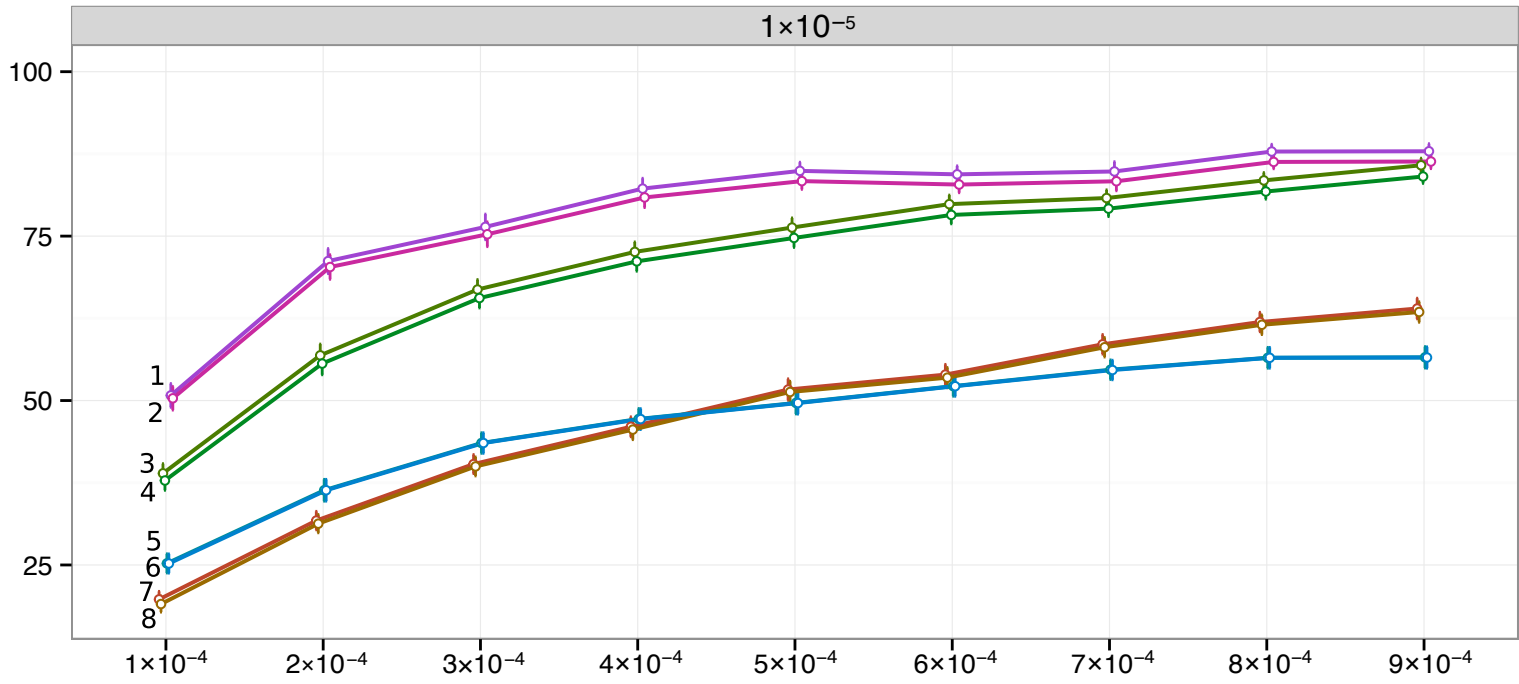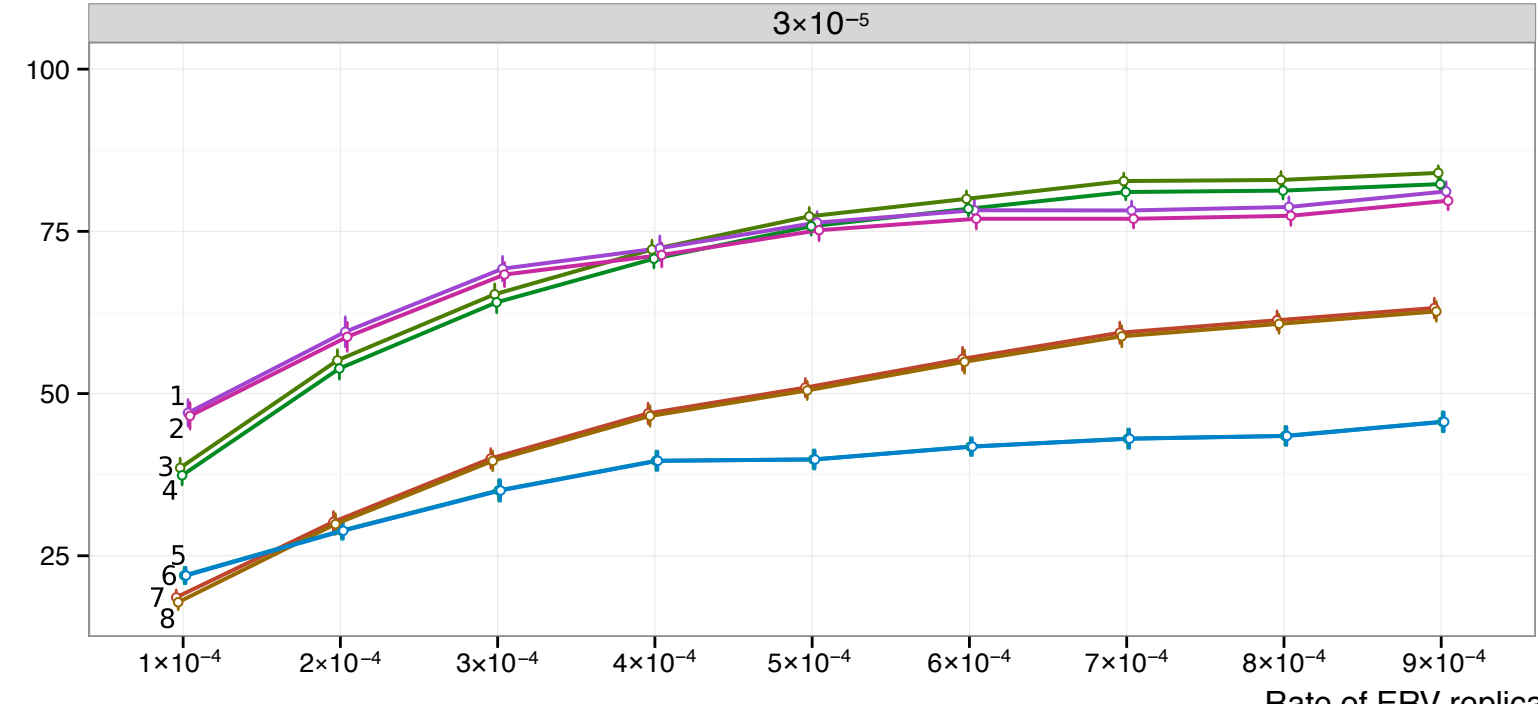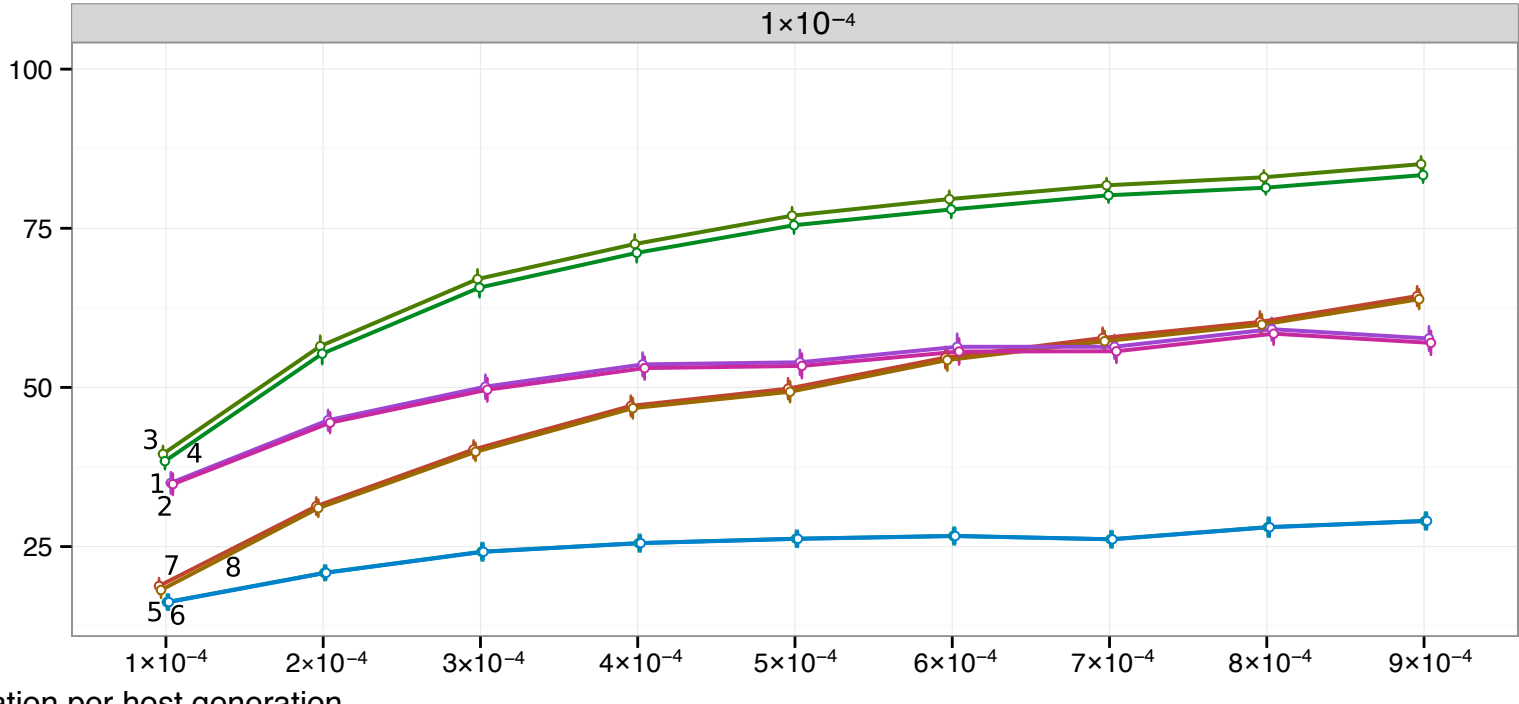

- 1 ◆ TM-m- Rooted True / ML 10,000
- 2 ◆ TM-m- Unrooted True / ML 10,000
- 3 ◆ SMM-m- Rooted True / ML 10,000
- 4 ◆ SMM-m- Unrooted True / ML 10,000
- 5 ◆ TM-i- Rooted True / ML 10,000
- 6 ◆ TM-i- Unrooted True / ML 10,000
- 7 ◆ SMM-i- Rooted True / ML 10,000
- 8 ◆ SMM-i- Unrooted True / ML 10,000

Rate of ERV replication per host generation
